# Supplementary material
Source: PubMed Central journal article supplement (PMC4794036)
Supplement: luan024450.ww4_default.pdf [file luan024450.ww4_default.pdf]

## Appendix 4: WINBUGS code for network meta-analysis [posted as supplied by author]

### a) Base case analysis

```

# Trial-level data given as treatment differences
# Random effects model for multi-arm trials
model{
  # *** PROGRAM STARTS
  for(i in 1:ns) {
    # LOOP THROUGH STUDIES
    y[i] ~ dnorm(delta[i],prec[i]) # normal likelihood for trials
    var[i] <- pow(se[i],2) # calculate variances
    prec[i] <- 1/var[i] # set precisions

    # Trial-specific meandiff distributions
    delta[i] ~ dnorm(md[i],tau)

    #Mean of random effects distributions,with multi-arm trial correct
    md[i] <- d[t[i,2]] - d[t[i,1]]

    #Deviance contribution
    dev[i] <- (y[i]-delta[i])*(y[i]-delta[i])*prec[i]

    #summed residual deviance contribution for this trial
    resdev[i] <- sum(dev[i])
  }
  totresdev <- sum(resdev[]) #Total Residual Deviance
  d[1]<-0 # Treatment effect is zero for reference treatment
  # Vague priors for treatment effects
  for (k in 2:nt){d[k] ~ dnorm(0,.0001)}
  }
  between.trial.var ~ dunif(0,5)
  tau<- 1/between.trial.var

  test~dnorm(2,4)I(0.1,)

  #Ranking
  for (k in 1:4) {
    rk[k] <- 5-rank(d[],k)
    best[k] <- equals(rk[k],1)}
} # *** PROGRAM ENDS

# ns= number of studies;
# nt=number of treatments;

list(ns=12, nt=4, nc=6)
c[] t[,1] t[,2] y[] se[]
1 1 3 0.4711 0.1647
2 1 4 2.4499 0.1691
3 2 4 0.7974 0.4078
4 4 4 1.0656 0.1131
2 1 4 2.2700 0.3041
1 1 3 5.4996 1.4148
1 1 3 1.9448 0.8245
2 1 4 2.8740 0.1402
1 1 3 1.3230 0.8183
5 3 3 -1.8738 0.6183
6 2 3 0.6408 0.4910
5 3 3 -0.5222 1.2273
END

```

**Dbar = post.mean of -2logL; Dhat = -2LogL at post.mean of stochastic nodes**

|       | Dbar   | Dhat  | pD     | DIC    |
|-------|--------|-------|--------|--------|
| test  | 0.000  | 0.000 | -0.000 | 0.000  |
| y     | 13.467 | 3.074 | 10.396 | 23.860 |
| total | 13.467 | 3.074 | 10.396 | 23.860 |

## b) Sensitivity analysis

Code and results for sensitivity analysis excluding studies where interventions were introduced at multiple time points (Helms et al., Kirkland et al., and Al-Tawfiq et al).

```
# Trial-level data given as treatment differences
# Random effects model for multi-arm trials
model{
  for(i in 1:ns) {
    y[i] ~ dnorm(delta[i],prec[i])
    var[i] <- pow(se[i],2)
    prec[i] <- 1/var[i]

    # Trial-specific meandiff distributions
    delta[i] ~ dnorm(md[i],tau)

    #Mean of random effects distributions,with multi-arm trial correct
    md[i] <- d[t[i,2]] - d[t[i,1]]

    #Deviance contribution
    dev[i] <- (y[i]-delta[i])*(y[i]-delta[i])*prec[i]

    #summed residual deviance contribution for this trial
    resdev[i] <- sum(dev[i])
  }
  totresdev <- sum(resdev[])
  d[1]<-0
  for (k in 2:nt){d[k] ~ dnorm(0,.0001)}
  between.trial.var ~ dunif(0,5)
  tau<- 1/between.trial.var

  test~dnorm(2,4)I(0.1,)

  #Ranking
  for (k in 1:4) {
    rk[k] <- 5-rank(d[],k)
    best[k] <- equals(rk[k],1)}
}

# ns= number of studies;
# nt=number of treatments;
```

```
list(ns=9, nt=4, nc=6)
c[] t[,1] t[,2] y[] se[]
1 1 3 0.4711 0.1647
3 2 4 0.7974 0.4078
4 4 4 1.0656 0.1131
2 1 4 2.2700 0.3041
2 1 4 2.8740 0.1402
1 1 3 1.3230 0.8183
5 3 3 -1.8738 0.6183
6 2 3 0.6408 0.4910
5 3 3 -0.5222 1.2273
END
```

**Dbar = post.mean of -2logL; Dhat = -2LogL at post.mean of stochastic nodes**

|       | <b>Dbar</b> | <b>Dhat</b> | <b>pD</b> | <b>DIC</b> |
|-------|-------------|-------------|-----------|------------|
| test  | 0.000       | 0.000       | -0.000    | 0.000      |
| y     | 6.661       | -1.189      | 7.851     | 14.512     |
| total | 6.661       | -1.189      | 7.851     | 14.512     |
