# Supplementary material
Source: PubMed Central journal article supplement (PMC4794036)
Supplement: luan024450.ww5_default.pdf [file luan024450.ww5_default.pdf]

**Appendix 5: Excluded studies with reason by EPOC criteria [posted as supplied by author]**

| No. | Authors          | Year  | Meet inclusion criteria | Meet EPOC criteria | Reason for exclusion <sup>a</sup>          |
|-----|------------------|-------|-------------------------|--------------------|--------------------------------------------|
| 1   | Abela            | 2012  | Y                       | N                  | UBA with no control                        |
| 2   | Aboumatar        | 2012  | Y                       | N                  | ITS with inadequate data collection points |
| 3   | Alemagno         | 2010  | Y                       | N                  | UBA with no control                        |
| 4   | Allegranzi       | 2010  | Y                       | N                  | UBA with no control                        |
| 5   | Allegranzi       | 2013  | Y                       | N                  | UBA with no control                        |
| 6   | Ananda-Rajah     | 2010  | Y                       | N                  | ITS with inadequate data collection points |
| 7   | Apisarnthanarak  | 2010a | Y                       | N                  | UBA with no control                        |
| 8   | Apisarnthanarak  | 2010b | Y                       | N                  | CBA with uncomparable control              |
| 9   | Ardizzone        | 2013  | Y                       | N                  | UBA with no control                        |
| 10  | Barahona-Guzman  | 2014  | Y                       | N                  | ITS with inadequate data collection points |
| 11  | Barbut           | 2013  | Y                       | N                  | UBA for AHR use/ ITS for HAI rate          |
| 12  | Barrera          | 2011  | Y                       | N                  | ITS with inadequate data collection points |
| 13  | Bessesen         | 2013  | Y                       | N                  | UBA with no control                        |
| 14  | Bingham          | 2010  | Y                       | N                  | UBA with no control                        |
| 15  | Biswal           | 2013  | Y                       | N                  | UBA with no control                        |
| 16  | Boog             | 2013  | Y                       | N                  | ITS with inadequate data collection points |
| 17  | Borges           | 2012  | Y                       | N                  | UBA with no control                        |
| 18  | Bouadma          | 2010  | Y                       | N                  | UBA with no control                        |
| 19  | Buffet-Bataillon | 2010  | Y                       | N                  | UBA with no control                        |
| 20  | Bukhari          | 2011  | Y                       | N                  | UBA, no baseline data                      |
| 21  | Caniza           | 2009  | Y                       | N                  | UBA with no control                        |
| 22  | Chen             | 2011  | Y                       | N                  | UBA with no control                        |
| 23  | Cheng            | 2010  | Y                       | N                  | UBA for AHR use/ ITS for HAI rate          |
| 24  | Costers          | 2012  | Y                       | N                  | UBA with no control                        |
| 25  | Cumbler          | 2013  | Y                       | N                  | ITS with inadequate data collection points |
| 26  | Davis            | 2010  | Y                       | N                  | UBA with no control                        |
| 27  | Macedo           | 2012  | Y                       | N                  | UBA with no control                        |
| 28  | di Martino       | 2011  | Y                       | N                  | UBA with no control                        |
| 29  | DiDiodato        | 2013  | Y                       | N                  | UBA with no control                        |
| 30  | Dierssen-Sotos   | 2010a | Y                       | N                  | UBA with no control                        |
| 31  | Dierssen-Sotos   | 2010b | Y                       | N                  | UBA with no control                        |
| 32  | Dilek            | 2012  | Y                       | N                  | UBA with no control                        |

|    |                   |       |   |   |                                            |
|----|-------------------|-------|---|---|--------------------------------------------|
| 33 | Dos Santos        | 2013  | Y | N | ITS with inadequate data collection points |
| 34 | El-Kafrawy        | 2013  | Y | N | UBA with no control                        |
| 35 | Eveillard         | 2011  | Y | N | UBA with no control                        |
| 36 | Fakhry            | 2012  | Y | N | UBA with no control                        |
| 37 | Fitzpatrick       | 2011  | Y | N | UBA with no control                        |
| 38 | Forrester         | 2010  | Y | N | UBA with no control                        |
| 39 | Garcia-Rodriguez  | 2013  | Y | N | UBA with no control                        |
| 40 | Garcia-Vazquez    | 2011  | Y | N | UBA with no control                        |
| 41 | Gill              | 2009  | Y | N | CBA with only 1 control                    |
| 42 | Graf              | 2013  | Y | N | UBA with no control                        |
| 43 | Grant             | 2011  | Y | N | UBA with no control                        |
| 44 | Grayson           | 2011  | Y | N | ITS with inadequate data collection points |
| 45 | Harne-Britner     | 2011  | Y | N | CBA with only 1 control                    |
| 46 | Helder            | 2010  | Y | N | UBA with no control                        |
| 47 | Helder            | 2012  | Y | N | UBA, no baseline data                      |
| 48 | Henderson         | 2012  | Y | N | UBA with no control                        |
| 49 | Homa              | 2011  | Y | N | ITS with inadequate data collection points |
| 50 | Jaggi             | 2013  | Y | N | UBA with no control                        |
| 51 | Jamal             | 2012  | Y | N | ITS with inadequate data collection points |
| 52 | Jeong             | 2013  | Y | N | UBA with no control                        |
| 53 | Kanj              | 2013  | Y | N | UBA with no control                        |
| 54 | KelcÁkova         | 2012  | Y | N | UBA, no baseline data                      |
| 55 | Kim               | 2013  | Y | N | UBA with no control                        |
| 56 | Kindness          | 2010  | Y | N | UBA, no baseline data                      |
| 57 | Kowitt            | 2013  | Y | N | ITS with inadequate data collection points |
| 58 | Langston          | 2011  | Y | N | UBA with no control                        |
| 59 | Leblebicioglu     | 2013a | Y | N | UBA with no control                        |
| 60 | Leblebicioglu     | 2013b | Y | N | UBA with no control                        |
| 61 | Levchenko         | 2011  | Y | N | UBA with no control                        |
| 62 | Linam             | 2011  | Y | N | UBA with no control                        |
| 63 | Ling              | 2012  | Y | N | UBA with no control                        |
| 64 | Lobo              | 2010  | Y | N | UBA with no control                        |
| 65 | Marra             | 2013  | Y | N | UBA, no baseline data                      |
| 66 | Mathai            | 2011  | Y | N | UBA with no control                        |
| 67 | Mazi              | 2013  | Y | N | ITS with inadequate data collection points |
| 68 | Molina-Cabrillana | 2010  | Y | N | UBA with no control                        |
| 69 | Monistrol         | 2012  | Y | N | UBA with no control                        |
| 70 | Monistrol         | 2013  | Y | N | UBA with no control                        |
| 71 | Mukerji           | 2013  | Y | N | UBA with no control                        |
| 72 | Pontivivo         | 2012  | Y | N | ITS with inadequate data collection points |

|     |                |       |   |   |                                            |
|-----|----------------|-------|---|---|--------------------------------------------|
| 73  | Prospero       | 2010  | Y | N | UBA with no control                        |
| 74  | Rahim          | 2009  | Y | N | UBA with no control                        |
| 75  | Rees           | 2013  | Y | N | ITS with inadequate data collection points |
| 76  | Reichardt      | 2014  | Y | N | UBA with no control                        |
| 77  | Rello          | 2013  | Y | N | UBA with no control                        |
| 78  | Roberts        | 2012  | Y | N | ITS with inadequate data collection points |
| 79  | Rogers         | 2010  | Y | N | UBA with no control                        |
| 80  | Rosenthal      | 2010  | Y | N | UBA with no control                        |
| 81  | Rosenthal      | 2012a | Y | N | UBA with no control                        |
| 82  | Rosenthal      | 2012b | Y | N | UBA with no control                        |
| 83  | Rosenthal      | 2012c | Y | N | UBA with no control                        |
| 84  | Rosenthal      | 2012d | Y | N | UBA with no control                        |
| 85  | Rosenthal      | 2013  | Y | N | UBA with no control                        |
| 86  | Sahud          | 2012  | Y | N | ITS with inadequate data collection points |
| 87  | Saint          | 2009  | Y | N | UBA with no control                        |
| 88  | Salama         | 2013  | Y | N | UBA with no control                        |
| 89  | Santos         | 2013  | Y | N | UBA with no control                        |
| 90  | Saramma        | 2011  | Y | N | UBA with no control                        |
| 91  | Scheithauer    | 2012  | Y | N | UBA, no baseline data                      |
| 92  | Scheithauer    | 2013a | Y | N | UBA with no control                        |
| 93  | Scheithauer    | 2013b | Y | N | UBA with no control                        |
| 94  | Scheithauer    | 2013c | Y | N | UBA with no control                        |
| 95  | Seirafian      | 2013  | Y | N | UBA with no control                        |
| 96  | Seto           | 2013  | Y | N | ITS with inadequate data collection points |
| 97  | Simmons        | 2013  | Y | N | UBA with no control                        |
| 98  | Son            | 2011  | Y | N | UBA with no control                        |
| 99  | Song           | 2013  | Y | N | ITS with inadequate data collection points |
| 100 | Tromp          | 2012  | Y | N | UBA with no control                        |
| 101 | van den Hoogen | 2011  | Y | N | UBA with no control                        |

<sup>a</sup>UBA, uncontrolled before-after study; CBA, controlled before-after study; ITS, interrupted time series study; AHR, alcohol based hand rub; and HAI, healthcare associated infection.
