# Supplementary material
Source: PubMed Central journal article supplement (PMC4794036)
Supplement: luan024450.ww6_default.pdf [file luan024450.ww6_default.pdf]

**Appendix 6:** Summary of study characteristics. [posted as supplied by author]

| Author (year) | Study design         | Study period/ duration                                                                                                                                     | Settings and Details of the design                                                                                                                                                                    | Unit of Participant | Population | Interventions   | Comparison group                | Methods of observation                  | Indication                                                                                                  | Outcomes                                                                    | Country           |
|---------------|----------------------|------------------------------------------------------------------------------------------------------------------------------------------------------------|-------------------------------------------------------------------------------------------------------------------------------------------------------------------------------------------------------|---------------------|------------|-----------------|---------------------------------|-----------------------------------------|-------------------------------------------------------------------------------------------------------------|-----------------------------------------------------------------------------|-------------------|
| Fuller (2012) | CRCT (Stepped wedge) | Total: 39 months<br>Baseline: approx. 20 months<br>Intervention: approx. 20 months<br><br>October 2006 to December 2009                                    | 60 wards from 16 hospital trusts<br><br>Experimental: 33 mixed wards from 13 trusts<br>Control: 27 mixed wards from 11 trusts                                                                         | Ward                | HCWs       | WHO-5+GOAL+FED  | WHO-5 (UK national campaign)    | Direct observation by ward coordinators | Before and after patient contact                                                                            | Hand hygiene compliance<br>Soap and AHR consumption                         | England and Wales |
| Huis (2013)   | CRCT                 | Total: 13 months<br>Baseline: 1 month<br>Intervention: 6 months<br>Follow up (no intervention): 6 months<br><br>September 2008 to November 2009            | 67 wards from 3 hospitals<br><br>Experimental: 30 mixed wards<br>Control: 37 mixed wards                                                                                                              | Ward                | Nurses     | WHO-5+GOAL      | WHO-5 (except SAF)              | Direct observation by nursing student   | Before and after patient contact, patient surroundings and use of gloves                                    | Hand hygiene compliance                                                     | Netherlands       |
| Mertz (2010)  | CRCT                 | Total: 15 months<br>Baseline: 3 months<br>Intervention: 12 months<br><br>October 2006 to December 2006 (Baseline) and June 2007 to May 2008 (Intervention) | 30 wards from 3 acute care sites<br><br>Experimental: 15 mixed wards<br>Control: 15 mixed wards<br><br>Randomized stratified by hospital site and type of hospital unit. (number of bed not reported) | Ward                | HCWs       | SYS+EDU+FED+REM | SYS (with AHR at point of care) | Direct observation by researchers       | Before and after patient contact, skin wounds or mucous, insertion of an intravenous line and use of gloves | Hand hygiene compliance<br>Incidence of hospital-acquired MRSA colonisation | Canada            |

|                  |     |                                                                                                                                           |                                                                                                                   |            |                                                   |             |                                 |                                                    |                                                                                                                         |                                                                                                                                                        |                             |
|------------------|-----|-------------------------------------------------------------------------------------------------------------------------------------------|-------------------------------------------------------------------------------------------------------------------|------------|---------------------------------------------------|-------------|---------------------------------|----------------------------------------------------|-------------------------------------------------------------------------------------------------------------------------|--------------------------------------------------------------------------------------------------------------------------------------------------------|-----------------------------|
| Huang (2002)     | RCT | Intervention: 4 months period (Pre and Post-test)<br><br>September 2000 to January 2001                                                   | 100 randomly selected nurses from a 1,300 bed hospital<br><br>Experimental: 50 nurses<br>Control: 50 nurses       | Individual | Nurses                                            | EDU         | None (unclear AHR)              | Direct observation by researchers                  | Before and after patient contact                                                                                        | Hand washing compliance                                                                                                                                | China                       |
| Fisher (2013)    | RCT | Total: 24 weeks<br>Baseline: 14 weeks<br>Intervention I: 6 week<br>Intervention II: 4 weeks<br><br>Start from January 2012                | 233 participants from 3 wards from 2 hospitals<br><br>Experimental: 119 participants<br>Control: 114 participants | Individual | HCWs                                              | SYS+REM+FED | SYS (with AHR at point of care) | Direct observation by trained nurses               | Room entry and exit                                                                                                     | Hand hygiene compliance<br>AHR consumption                                                                                                             | Singapore                   |
| Salamat i (2013) | RCT | No data provided<br><br>Year 2010                                                                                                         | 128 participants from a 109-bed hospital<br><br>Experimental: 64 participants<br>Control: 64 participants         | Individual | Nurses, Anesthesiology, Technician, and Nurse-aid | SYS+EDU+FED | SYS+EDU                         | Direct observation by infection control supervisor | Unclear                                                                                                                 | Hand hygiene score with unclear details                                                                                                                | Iran                        |
| Derde (2014)     | ITS | Total: 36 months (3 years)<br>Baseline: 6 months<br>Intervention I: 18 months<br>Intervention II: 12 months<br><br>May 2008 to April 2011 | 13 European ICUs (all with least 8 beds)                                                                          | Ward       | HCWs                                              | EDU+FED+REM | REM (unclear AHR use)           | Direct observation by researchers                  | Before and after patient contact, before an aseptic task, and after contact with patients' body fluids and surroundings | Hand hygiene compliance<br>Acquisition of MRSA, vancomycin-resistant <i>enterococci (VRE)</i> , and highly resistant <i>Enterobacteriaceae (HRE)</i> . | Multiple European countries |

|                  |     |                                                                                                                                                                                                |                                                                              |          |      |            |                                                                           |                                              |                                                                                                                                                                                                 |                                                                                                                                                                                                            |                                                                                                                             |
|------------------|-----|------------------------------------------------------------------------------------------------------------------------------------------------------------------------------------------------|------------------------------------------------------------------------------|----------|------|------------|---------------------------------------------------------------------------|----------------------------------------------|-------------------------------------------------------------------------------------------------------------------------------------------------------------------------------------------------|------------------------------------------------------------------------------------------------------------------------------------------------------------------------------------------------------------|-----------------------------------------------------------------------------------------------------------------------------|
| Lee (2013)       | ITS | Total: 24 months (2 years)<br>Baseline: 6 months<br>Intervention: 12 months<br>Post-Intervention (Wash out): 6 months<br><br>March 2008 to July 2010                                           | 33 Surgical wards of 10 hospitals in 9 countries                             | Ward     | HCWs | WHO-5      | None (with AHR) in 1 hospital, SYS in 1 hospital and WHO-5 in 2 hospitals | Direct observation by researchers            | Before and after patient contact, before an aseptic task, and after contact patients' body fluids and surroundings                                                                              | Hand hygiene compliance<br>MRSA infection rates<br>MRSA surgical site infection rates                                                                                                                      | Multi-center<br>9 European countries including Germany, Israel, Serbia, Switzerland, France, Greece, Italy, Spain, Scotland |
| Marra (2013)     | ITS | Total: 12 months<br>Baseline: 3 months<br>Intervention: 9 months<br><br>August 2011 to July 2012                                                                                               | 9 wards (8 ICUs and 1 general ward) from 7 tertiary hospitals in 2 countries | Ward     | HCWs | WHO-5      | None (with AHR)                                                           | Direct observation by trained nurses         | WHO "Five Moments of Hand Hygiene"                                                                                                                                                              | Hand hygiene compliance<br>Device-associated infection rate                                                                                                                                                | Brazil and Thailand                                                                                                         |
| Al-Tawfiq (2013) | ITS | Total: 54 months (4 years 6 months)<br>Baseline: 9 months<br>Intervention: 42 months (implemented at multiple time points)<br>Post-Intervention: 3 months<br><br>October 2006 to December 2011 | A 350-bed hospital                                                           | Hospital | HCWs | WHO-5+GOAL | None (with AHR)                                                           | Direct observation by infection control team | Before wearing gloves, after removing gloves, before and after patient contact, after leaving patient's room, before and after performing invasive procedures, and after contact with patient's | Hand hygiene compliance<br>AHR consumption<br>Healthcare-associated MRSA, Ventilator-associated infection, Central line-associated bloodstream infections and Catheter-associated urinary tract infection. | Saudi Arabia                                                                                                                |

|                         |     |                                                                                                                                                            |                                                                       |          |                                                  |                          |                        |                                                                                                        |                                                 |                                    |     |
|-------------------------|-----|------------------------------------------------------------------------------------------------------------------------------------------------------------|-----------------------------------------------------------------------|----------|--------------------------------------------------|--------------------------|------------------------|--------------------------------------------------------------------------------------------------------|-------------------------------------------------|------------------------------------|-----|
|                         |     |                                                                                                                                                            |                                                                       |          |                                                  |                          |                        |                                                                                                        | body fluids.                                    |                                    |     |
| Armelli<br>no<br>(2013) | ITS | Total: 17 months<br>Baseline: 1 month<br>Intervention: 16 months<br><br>March 2010 to July 2011                                                            | An 18-bed surgical intensive care unit (SICU) from a 804-bed hospital | Ward     | HCWs                                             | FED + GOAL               | None (unclear AHR use) | Electronic motion sensor and video recorders and sinks and dispensers. Review and audit by researchers | Room entry and exit                             | Hand hygiene compliance            | USA |
| Armelli<br>no<br>(2012) | ITS | Total: 25 months<br>Baseline: 4 months<br>Intervention: 4 months<br>Maintenance: 17 months<br><br>June 2008 to June 2010                                   | A 17-bed medical intensive care unit from a 804-bed hospital          | Ward     | HCWs                                             | FED + GOAL               | None (unclear AHR use) | Electronic motion sensor and video recorders and sinks and dispensers. Review and audit by researchers | Room entry and exit                             | Hand hygiene compliance            | USA |
| Chan<br>(2013)          | ITS | Total: 7 months<br>Baseline: 1 month<br>Intervention: 6 months<br><br>April 2009 to October 2009                                                           | A general medical unit with 10 single rooms                           | Ward     | HCWs and others including patients and relatives | SYS                      | None (with AHR)        | n/a                                                                                                    | Dispenser count                                 | Hand hygiene event per patient-day | USA |
| Crews<br>(2013)         | ITS | Total: 63 months (5 years 3 months)<br>Baseline: 9 months<br>Intervention: 15 months (implemented at multiple time points)<br>Post-Intervention: 39 months | A 46-bed children hospital                                            | Hospital | HCWs                                             | SYS+EDU+FED+REM+INC+GOAL | EDU (with AHR)         | Direct observation by contracted certified infection control practitioner                              | Before and after contact patient or environment | Hand hygiene compliance            | USA |

|                |                              |                                                                                                                                                                      |                                                                                                     |          |                                                                          |                                                          |                                                            |                                                                   |                                     |                                                               |             |
|----------------|------------------------------|----------------------------------------------------------------------------------------------------------------------------------------------------------------------|-----------------------------------------------------------------------------------------------------|----------|--------------------------------------------------------------------------|----------------------------------------------------------|------------------------------------------------------------|-------------------------------------------------------------------|-------------------------------------|---------------------------------------------------------------|-------------|
|                |                              | October 2006 to December 2011                                                                                                                                        |                                                                                                     |          |                                                                          |                                                          |                                                            |                                                                   |                                     |                                                               |             |
| Salmon (2013)  | ITS                          | Total: 45 months (3 years 9 months)<br>Baseline: 18 months<br>Intervention: 3 month<br>Post-Intervention: 24 months<br><br>January 2009 to September 2012            | A 1,032-bed hospital                                                                                | Hospital | Nursing students                                                         | EDU                                                      | None (unclear AHR use)                                     | Direct observation by infection control nurses                    | WHO "Five Moments of Hand Hygiene"  | Hand hygiene compliance                                       | Singapore   |
| Talbot (2013)  | ITS                          | Total: 68 months (5 years 8 months)<br>Baseline: 29 months<br>Intervention phase I: 18 months<br>Intervention phase II: 21 months<br><br>January 2007 to August 2012 | A university medical center (support 65,000 inpatient admission, annually)                          | Hospital | HCWs<br>Settings were inpatient, outpatient clinics and procedural areas | Phase I: WHO-5+INC+GOAL<br>Phase II: WHO-5+INC+GOAL+A-CC | Phase I: EDU (unclear AHR use)<br>Phase II: WHO-5+INC+GOAL | Direct observation by trained healthcare workers                  | WHO "Five Moments of Hand Hygiene"  | Hand hygiene compliance<br>Device-associated infection rate   | USA         |
| Higgins (2013) | ITS                          | Total: 30 months (2 years 6 months)<br>Baseline: 15 months<br>Intervention: 15 months<br><br>November 2009 to April 2012                                             | A tertiary referral private hospital (acute healthcare setting)<br><br>(number of bed not reported) | Hospital | HCWs                                                                     | WHO-5+INC                                                | None (with AHR)                                            | Direct observation by trained infection prevention control nurses | WHO "Five Moments of Hand Hygiene"  | Hand hygiene compliance                                       | Ireland     |
| Helder (2012)  | ITS (for hand hygiene event) | Total: 4 months<br>Baseline: 2 months<br>Intervention: 2 months                                                                                                      | A 27-bed Neonatal Intensive Care Unit (NICU)                                                        | Ward     | HCWs                                                                     | (SYS+) REM                                               | SYS (with AHR at POC)                                      | Electronic dispensers pre-counting<br>Direct                      | Before and after touching a sterile | Hand hygiene compliance (pre-post test)<br>Hand hygiene event | Netherlands |

|                 |                                                                                                 |                                                                                                                  |                                                             |                  |      |                 |                        |                                                       |                                                                                   |                                                                                                                                        |                   |
|-----------------|-------------------------------------------------------------------------------------------------|------------------------------------------------------------------------------------------------------------------|-------------------------------------------------------------|------------------|------|-----------------|------------------------|-------------------------------------------------------|-----------------------------------------------------------------------------------|----------------------------------------------------------------------------------------------------------------------------------------|-------------------|
|                 | BA (for HHC% observation) not eligible as no control group and inadequate data collection point | January 2008 to May 2008                                                                                         |                                                             |                  |      |                 |                        | observation by medical students                       | procedures, before and after the use of gloves and after contact with body fluids | per patient-day                                                                                                                        |                   |
| Kirkland (2012) | ITS                                                                                             | Total: 48 months (4 years)<br>Baseline: 6 months<br>Intervention: 42 months<br><br>January 2006 to November 2009 | A 383-bed teaching hospital                                 | Hospital         | HCWs | WHO-5           | None (with AHR)        | Direct observation by trained infection control staff | Before and after contact with patients or their immediate environment             | Hand hygiene compliance<br><i>Staphylococcus aureus</i> infections, <i>Clostridium difficile</i> infections and bloodstream infections | USA               |
| Morgan (2012)   | ITS                                                                                             | Total: 30 weeks<br>Baseline: 15 weeks<br>Intervention: 15 weeks<br><br>March 2010 to October 2010                | 2 ITS wards; Neurological ICU and Cardiac ICU, 15 beds each | Ward             | HCWs | SYS+EDU+FED+REM | None (with AHR)        | Direct observation by trained researcher              | Room entry and exit                                                               | Hand hygiene compliance                                                                                                                | USA               |
| Stone (2012)    | ITS                                                                                             | Total: 48 months (4 years)<br>Baseline: 5 months<br>Intervention: 43 months<br><br>July 2004 to June 2008        | 187 acute hospital trusts                                   | Trust (Hospital) | HCWs | WHO-5           | None (unclear AHR use) | n/a                                                   | Procurement                                                                       | AHR consumption<br>Antimicrobial consumption<br>Incidence of hospital acquired MRSA and MSSA bacteraemia                               | England and Wales |

|               |     |                                                                                                                                                                                    |                                                             |          |                                                              |                                                             |                                             |                                                                 |                                                              |                                                                                                                       |        |
|---------------|-----|------------------------------------------------------------------------------------------------------------------------------------------------------------------------------------|-------------------------------------------------------------|----------|--------------------------------------------------------------|-------------------------------------------------------------|---------------------------------------------|-----------------------------------------------------------------|--------------------------------------------------------------|-----------------------------------------------------------------------------------------------------------------------|--------|
| Jaggi (2012)  | ITS | Total: 12 months<br>Baseline: 6 months<br>Intervention: 6 months<br><br>January 2009 to December 2009                                                                              | A 215-bed tertiary-care hospital                            | Hospital | HCWs                                                         | Unclear                                                     | Unclear                                     | Direct observation by staff                                     | Unclear                                                      | Hand hygiene compliance<br>Central line-associated bloodstream infection rate (CLABSI)                                | India  |
| Lee (2012)    | ITS | Total: 6 years<br>Baseline: 3 years<br>Intervention: 3 years<br><br>January 2004 to December 2010                                                                                  | A 1162-bed tertiary-care university hospital                | Hospital | HCWs                                                         | WHO-5                                                       | None (with AHR)                             | n/a                                                             | Procurement                                                  | AHR consumption<br>Antimicrobial consumption<br>Incidence of healthcare acquired infection and hospital acquired-MRSA | Taiwan |
| Mestre (2012) | ITS | Total: 51 months (4 years 3 months)<br>Baseline: 27 months<br>Intervention phase I: 12 months (2010)<br>Intervention phase II: 12 months (2011)<br><br>March 2007 to December 2011 | A private 200-bed hospital                                  | Hospital | HCWs                                                         | Phase I: WHO-5<br>Phase II: WHO-5 (intense) + Reinforcement | Phase I: None (with AHR)<br>Phase II: WHO-5 | Direct observation by infection control and nursing supervisors | WHO "Five Moments of Hand Hygiene"                           | Hand hygiene compliance<br><br>AHR consumption<br><br>Hospital-acquired MRSA infection rate                           | Spain  |
| Koff (2011)   | ITS | Total: 36 months<br>Baseline: 12 month<br>Intervention: 12 months<br>Post-Intervention: 12 months<br><br>December 2006 to                                                          | A medical-surgical ICU<br><br>(number of beds not reported) | Ward     | HCWs (nursing staff, physicians, and respiratory therapists) | EDU+FED                                                     | None (with AHR)                             | Direct observation by infection control                         | Upon entering the patient care environment and after leaving | Hand hygiene compliance<br>Hand hygiene decontamination event<br>Ventilator associated pneumonia (VAP)                | USA    |

|                          |     |                                                                                                                                                                                                                                     |                                                                                        |          |      |                      |                                   |                                                           |                                                                                                                                        |                                                                                                            |        |
|--------------------------|-----|-------------------------------------------------------------------------------------------------------------------------------------------------------------------------------------------------------------------------------------|----------------------------------------------------------------------------------------|----------|------|----------------------|-----------------------------------|-----------------------------------------------------------|----------------------------------------------------------------------------------------------------------------------------------------|------------------------------------------------------------------------------------------------------------|--------|
|                          |     | November 2009                                                                                                                                                                                                                       |                                                                                        |          |      |                      |                                   |                                                           |                                                                                                                                        | rate<br>Catheter-related<br>bloodstream<br>infection (CRBSI)<br>rate                                       |        |
| Doron<br>(2011)          | ITS | Total: 18 months<br>Baseline: 6 months<br>Intervention: 12<br>months<br><br>September 2007 to<br>February 2009                                                                                                                      | A 425-bed hospital, an<br>academic medical center                                      | Hospital | HCWs | WHO-5                | SYS+EDU+FE<br>D+REM (with<br>AHR) | Direct<br>observation<br>by trained staff                 | Before touching<br>the patient or an<br>object in the<br>patient's room<br>and before or<br>after the<br>encounter with<br>the patient | Hand hygiene<br>compliance                                                                                 | USA    |
| Marra<br>(2010,<br>2011) | ITS | Total: 21 months,<br>East Step-down Unit<br>(SDU)<br>Baseline: 3 months<br>Intervention: 19<br>months<br><br>West Step-down Unit<br>(SDU)<br>Baseline: 6 months<br>Intervention: 15<br>months<br><br>April 2008 to<br>November 2009 | Two 20-bed SDUs from a<br>private tertiary care hospital<br>(all had single bed rooms) | Ward     | HCWs | WHO-5                | None (with<br>AHR)                | n/a                                                       | Dispenser count                                                                                                                        | Hand hygiene event<br>Alcohol gel<br>consumption<br>Incidence of<br>healthcare<br>associated<br>infections | Brazil |
| Yngstrom<br>(2011)       | ITS | Total: 10 months<br>Baseline: 3 months<br>Intervention: 6<br>months<br><br>September 2004 to                                                                                                                                        | A 110-bed<br>multidisciplinary district<br>hospital                                    | Hospital | HCWs | SYS+EDU+FED<br>+GOAL | None (with<br>AHR)                | Direct<br>observation<br>by trained nurse<br>at each ward | Use of short-<br>sleeved<br>uniforms,<br>protective<br>clothing, aprons<br>and gloves,                                                 | Basic hygiene<br>compliance<br>Incidence of<br>healthcare<br>associated infection<br>in ventilated         | Sweden |



|              |     |                                                                                                                          |                                                    |          |      |                |                 |                                                             |                                                                       |                                                                                                                                                                                          |     |
|--------------|-----|--------------------------------------------------------------------------------------------------------------------------|----------------------------------------------------|----------|------|----------------|-----------------|-------------------------------------------------------------|-----------------------------------------------------------------------|------------------------------------------------------------------------------------------------------------------------------------------------------------------------------------------|-----|
|              |     | June 2005                                                                                                                |                                                    |          |      |                |                 |                                                             | hand disinfection with AHR, and wearing rings and wristwatches        | patients (healthcare-associated infections with regard to ventilator associated pneumonia, intubation-related infections in blood vessels and healthcare-associated urinary infections). |     |
| Helms (2010) | ITS | Total: 12 months<br>Baseline: 3 months<br>Intervention: 9 months<br><br>August 2007 to July 2008                         | A 116-bed hospital                                 | Hospital | HCWs | WHO-5          | None (with AHR) | Direct observation by selected staff members and volunteers | WHO "Five Moments of Hand Hygiene" *(Information from author contact) | Hand hygiene compliance<br>Incidence of HAIs; urinary tract infection, ventilator associated pneumonia and central line infections                                                       | USA |
| Chou (2010)  | ITS | Total: 57 months (4 years 9 months)<br>Baseline: 21 months<br>Intervention: 36 months<br><br>April 2005 to December 2009 | A hospital, part of a 9-hospital healthcare system | Hospital | HCWs | WHO-5+INC+GOAL | None (with AHR) | Direct observation by a staff liaison from each department  | Based on opportunities                                                | Hand hygiene compliance                                                                                                                                                                  | USA |

|                 |     |                                                                                                                                                                   |                                                                                                                                                                |          |      |                                                               |                                 |                                     |                                    |                                                                                                                                   |             |
|-----------------|-----|-------------------------------------------------------------------------------------------------------------------------------------------------------------------|----------------------------------------------------------------------------------------------------------------------------------------------------------------|----------|------|---------------------------------------------------------------|---------------------------------|-------------------------------------|------------------------------------|-----------------------------------------------------------------------------------------------------------------------------------|-------------|
| Vernaz (2008)   | ITS | Total: 72 months (6 years)<br>Baseline: 22 months (1 year and 10 months)<br>Intervention: 50 months (4 years and 2 months)<br><br>February 2000 to September 2006 | A 2,200 bed tertiary university hospital                                                                                                                       | Hospital | HCWs | WHO-5 (Swiss national campaign)                               | SYS (with AHR at point of care) | n/a                                 | Procurement                        | AHR consumption<br>Antibiotics use<br>Incidence of MRSA and <i>C.difficile</i> (number of clinical isolates per 100 patient-days) | Switzerland |
| Whitby (2008)   | ITS | Total: 2 years<br>Baseline: 4 to 5 months<br>Intervention: 18 months<br><br>2004 to 2006                                                                          | 5 wards from a 800-bed hospital with 3 intervention groups<br>1) Washington campaign (1 ward)<br>2) Geneva campaign (2 wards)<br>3) AHR substitution (2 wards) | Ward     | HCWs | Group I: WHO-5<br>Group II: SYS+EDU+REM+SAF<br>Group III: SYS | None (with AHR)                 | n/a                                 | Dispenser (liquid soap) count      | Hand hygiene events per occupied bed-day                                                                                          | Australia   |
| Grayson (2008)  | ITS | Total: 48 months<br>Baseline: 24 months<br>Intervention: 24 months<br><br>October 2002 to September 2006                                                          | 6 healthcare institutions<br>4 urban sites (403 to 632 beds) and<br>2 regional sites (120 and 271 beds)                                                        | Hospital | HCWs | WHO-5 (Hand Hygiene Culture Change Program)                   | None                            | Direct observation by trained HCWs  | WHO "Five Moments of Hand Hygiene" | Hand hygiene compliance<br><br>AHR consumption<br><br>MRSA bacteraemia and clinical isolates                                      | Australia   |
| Eldridge (2006) | ITS | Total: 15 months<br>Baseline: 4 and 6 months<br>Intervention: 11 and 9 months<br><br>July 2003 to                                                                 | 4 intensive care units from 3 hospitals                                                                                                                        | Ward     | HCWs | WHO-5 (CDC's guidelines)                                      | None                            | Direct observation by nursing staff | Based on opportunities             | Hand hygiene compliance<br><br>AHR consumption                                                                                    | USA         |

|                 |     |                                                                                                                                             |                                                               |          |                               |                                             |                                 |                                                    |                                                          |                                                                                                                                                         |           |
|-----------------|-----|---------------------------------------------------------------------------------------------------------------------------------------------|---------------------------------------------------------------|----------|-------------------------------|---------------------------------------------|---------------------------------|----------------------------------------------------|----------------------------------------------------------|---------------------------------------------------------------------------------------------------------------------------------------------------------|-----------|
|                 |     | September 2004                                                                                                                              |                                                               |          |                               |                                             |                                 |                                                    |                                                          |                                                                                                                                                         |           |
| Johnson (2005)  | ITS | Total: 64 months<br>Baseline: 28 months<br>Intervention: 36 months<br><br>January 1999 to April 2004                                        | A 840-bed university teaching hospital                        | Hospital | HCWs                          | WHO-5 (Hand Hygiene Culture Change Program) | None                            | Direct observation by trained HCWs                 | WHO "Five Moments of Hand Hygiene"                       | Hand hygiene compliance<br><br>AHR consumption<br><br>MRSA bacteraemia and clinical isolates of ESBL-producing <i>E coli</i> and <i>Klebsiella spp.</i> | Australia |
| Khatib (1999)   | ITS | Total: 8 weeks<br>Baseline: 4 weeks<br>Intervention: 4 weeks<br><br>Data on date is not available                                           | One ICU                                                       | Ward     | Respiratory care practitioner | EDU+REM                                     | EDU                             | Direct observation by nursing staff                | Before and after mechanically ventilated patient contact | Hand hygiene compliance (hand washing)                                                                                                                  | USA       |
| Tibballs (1996) | ITS | Total: 25 weeks (5 months)<br>Baseline: 9 weeks<br>Intervention: 4 weeks<br>Postintervention: 12 weeks<br><br>Data on date is not available | A 18-bed pediatric intensive care unit in a tertiary hospital | Ward     | HCWs (medical officers)       | SYS+FED                                     | SYS (with AHR at point of care) | Direct observation by researcher and nursing staff | Before and after patient contact                         | Hand hygiene compliance (hand washing)                                                                                                                  | Australia |
| Dubbert (1990)  | ITS | Total: 14 weeks<br>Baseline: 6 weeks<br>Intervention I: 4 weeks (Phrase I)<br>Intervention II: 4 weeks (Phrase II)                          | A 12-bed intensive care unit                                  | Ward     | Nurses                        | Phase I: EDU<br>Phase II: EDU+FED           | None (unclear AHR use)          | Direct observation by infection control            | Procedure involved with patient contact                  | Hand hygiene compliance                                                                                                                                 | USA       |

|                |                      |                                                                                                                                                                                                                                                      |                                                                                                                                              |                 |        |                                             |                        |                                               |                                                                                           |                                                                  |                   |
|----------------|----------------------|------------------------------------------------------------------------------------------------------------------------------------------------------------------------------------------------------------------------------------------------------|----------------------------------------------------------------------------------------------------------------------------------------------|-----------------|--------|---------------------------------------------|------------------------|-----------------------------------------------|-------------------------------------------------------------------------------------------|------------------------------------------------------------------|-------------------|
|                |                      | Data on date is not available                                                                                                                                                                                                                        |                                                                                                                                              |                 |        |                                             |                        |                                               |                                                                                           |                                                                  |                   |
| Mayer (2011)   | Non-randomised trial | Total: 16 months<br>CCT step-down<br>Baseline: 2 months<br>Intervention phase I: varied between 2 to 7 months<br><br>August 2000 to November 2001<br><br>ITS (less than 3 time points baseline); 2 years 9 months<br><br>April 2003 to December 2006 | 3 unit groups (6 wards) from a 450-bed hospital<br><br>Intervention 2 units (4 wards)<br>Control 1 unit (2 wards)<br>Step-down phase 1 and 2 | Ward            | HCWs   | Phase I: SYS+EDU+FED<br>Phase II: WHO-5+INC | None (unclear AHR use) | Direct observation by trained part-time staff | Before, after, or before and after contact patient or patient's environment.              | Hand hygiene compliance<br>Hospital acquired MRSA infection rate | USA               |
| Benning (2011) | CBA                  | Total: 20 months (as a second phase of a national improving the quality of healthcare program)<br><br>March 2007 to September 2008                                                                                                                   | Total 18 hospitals<br><br>Intervention: 9 hospitals<br>Control: 9 matched hospitals by size and geographic area                              | Hospital        | HCWs   | SYS+REM+SAF                                 | None (with AHR)        | n/a                                           | Procurement                                                                               | Soap and AHR consumption                                         | England and Wales |
| Gould (1997)   | CBA                  | Total: 3 months intervention period<br><br>Data on date is not available                                                                                                                                                                             | Total 4 surgical wards from a teaching hospital<br><br>Intervention: 2 surgical wards<br>Control: 2 surgical wards                           | Ward/Individual | Nurses | EDU                                         | None (unclear AHR use) | Direct observation by researchers             | Frequency, appropriateness and duration of hand decontamination compliance and the use of | Hand decontamination compliance                                  | UK                |

|  |  |  |  |  |  |  |  |  |        |  |  |
|--|--|--|--|--|--|--|--|--|--------|--|--|
|  |  |  |  |  |  |  |  |  | gloves |  |  |
|--|--|--|--|--|--|--|--|--|--------|--|--|

\*SYS: system change, EDU: education, FED: feedback, REM: reminders, SAF: institutional safety climate, INC: incentives, GOAL: goal-setting, ACC: accountability, WHO-5: a combined intervention strategies including SYS, EDU, FED, REM, and SAF, AHR: alcohol based hand rub, HHC: hand hygiene compliance, HCW: healthcare worker, n/a: information is not available.
