# Supplementary material
Source: PubMed Central journal article supplement (PMC4794036)

## Appendix 9: Supplementary results [posted as supplied by author]

Supplementary Figure 1. Box-and-whiskers plot showing relative efficacy of different hand hygiene intervention strategies compared with standard of care when excluding studies where interventions were made at multiple time points from the network meta-analysis of interrupted time series studies. Lower and upper edges represent 25<sup>th</sup> and 75<sup>th</sup> percentiles from the posterior distribution; the central line represents the median. Whiskers extend to the 5<sup>th</sup> and 95<sup>th</sup> percentiles. Intervention strategies were as follows: single intervention; WHO-5; and WHO-5+ (WHO-5 combined with either Incentives, Goal-setting, or Accountability).

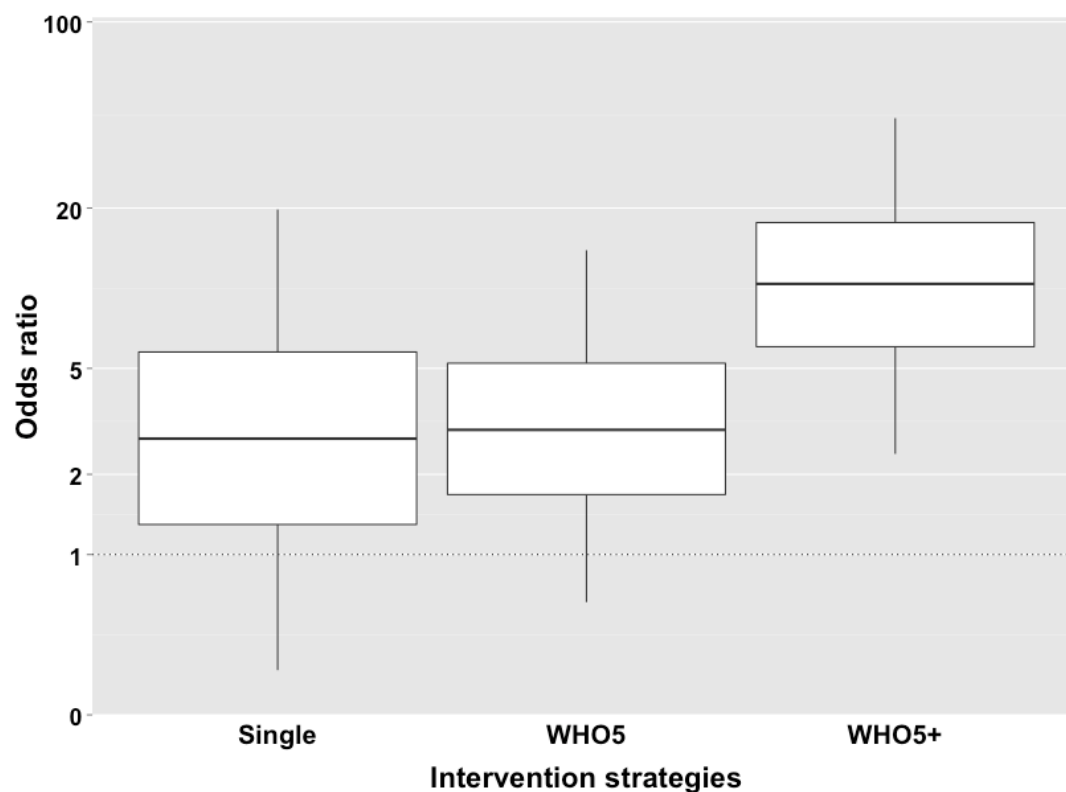

Supplement: luan024450.ww9_default.pdf [file luan024450.ww9_default.pdf]
